# Supplementary material for: Many genes in fish have species-specific asymmetric rates of molecular evolution
Source: Springer Nature journal article supplement (doi:10.1186/1471-2164-7-20), 2006-02-08
Supplement: Additional file 1 [file 1471-2164-7-20-s1.pdf]

## Supplementary Information

**S1:** List of asymmetric divergent genes of *Tetraodon nigroviridis* with significantly lower distance to the human ortholog than other fish species.

| GeneBank Acc# | annotation according to human (UniGene)                                       |
|---------------|-------------------------------------------------------------------------------|
| CAF87120      | NP_061917 hypothetical protein FLJ10996                                       |
| CAG14082      | NP_036463 methionine sulfoxide reductase A; peptide met (O) reductase         |
| CAF91195      | NP_003448 zinc finger protein 207                                             |
| CAF91040      | NP_055819 exosome component 7                                                 |
| CAF91601      | NP_113678 peroxisomal lon protease                                            |
| CAF90334      | NP_056132 pumilio homolog 2; pumilio (Drosophila) homolog 2                   |
| CAF95463      | XP_371246 PREDICTED: hypothetical protein FLJ21156                            |
| CAF94681      | NP_001395 eukaryotic translation elongation factor 1 gamma; elongation factor |
| CAF92823      | NP_079230 ubiquitin domain containing 1                                       |
| CAG01933      | NP_003706 vesicle docking protein p115; transcytosis-associated protein       |
| CAG01183      | NP_001893 cystathionase isoform 1; homoserine deaminase; homoserine           |
| CAG02866      | NP_115920 kin of IRRE like 3                                                  |
| CAF96262      | NP_003309 TTK protein kinase                                                  |
| CAG03725      | NP_036272 solute carrier family 25 (mitochondrial carrier; dicarboxylate      |
| CAG05711      | NP_005725 homeodomain interacting protein kinase 3; homeodomain-interacting   |
| CAG02777      | NP_057036 RWD domain containing 1; PTD013 protein; CGI-24 protein             |
| CAF98158      | NP_054836 PRO0149 protein                                                     |
| CAG10808      | NP_060705 CNDP dipeptidase 2 (metallopeptidase M20 family); cytosolic         |
| CAF98538      | NP_077284 hypothetical protein MGC4172                                        |
| CAF98584      | NP_068375 vacuolar protein sorting 11 (yeast homolog); vacuolar protein       |
| CAG08659      | NP_005739 YY1 associated factor 2                                             |
| CAG08776      | NP_078974 mitochondrial glutamate carrier 1                                   |
| CAG08510      | NP_116052 ubiquitin specific protease 30                                      |
| CAG07399      | NP_002323 low density lipoprotein-related protein 1; alpha-2-macroglobulin    |
| CAG03960      | NP_079423 hypothetical protein FLJ13448                                       |

**S2:** List of asymmetric divergent genes of *Tetraodon nigroviridis* with significantly higher distance to the human ortholog than other fish species.

| GeneBank Acc# | annotation according to human (UniGene)                                      |
|---------------|------------------------------------------------------------------------------|
| CAF92520      | NP_055262 ADP-ribosylation factor interacting protein 1 (arfaptin 1)         |
| CAF91538      | XP_375074 PREDICTED: KIAA0391                                                |
| CAF94283      | NP_004143 ornithine decarboxylase antizyme 1; antizyme 1                     |
| CAF87029      | NP_694558 hypothetical protein FLJ30596                                      |
| CAF93255      | NP_006463 thioredoxin interacting protein; upregulated by                    |
| CAF91349      | NP_653321 multiple coiled-coil GABABR1-binding protein                       |
| CAF96622      | NP_057178 COMM domain containing 2; HSPC042 protein                          |
| CAF95451      | NP_001640 apical protein of Xenopus-like; APX homolog of Xenopus             |
| CAF96104      | NP_009200 syntaxin binding protein 3; syntaxin 4 binding protein             |
| CAF95852      | NP_110396 N-acetylneuraminase pyruvate lyase; dihydrodipicolinate synthase   |
| CAG01934      | NP_987100 Ras-GTPase activating protein SH3 domain-binding protein 2 isoform |
| CAG01161      | NP_056099 KIAA0467 protein                                                   |
| CAF96336      | NP_055512 C-terminal PDZ domain ligand of neuronal nitric oxide synthase     |
| CAG05951      | NP_000685 aldehyde dehydrogenase 3B1; aldehyde dehydrogenase 7               |
| CAG05961      | NP_002530 ornithine decarboxylase 1                                          |
| CAG00619      | NP_612451 hypothetical protein BC013949                                      |
| CAG04864      | NP_060284 hypothetical protein FLJ20422                                      |
| CAG12701      | XP_033371 PREDICTED: chromosome 14 open reading frame 120                    |
| CAG10304      | NP_689601 hypothetical protein FLJ33282                                      |
| CAG01778      | NP_699193 hypothetical protein MGC46520; chromosome 6 open reading frame 158 |
| CAG12647      | XP_379784 PREDICTED: similar to GLCC11 protein                               |
| CAG03482      | NP_079415 hypothetical protein ARM                                           |
| CAG13224      | NP_056415 chromosome 20 open reading frame 22                                |
| CAF97249      | NP_001955 early growth response 1; nerve growth factor-induced protein A     |
| CAG10182      | NP_000129 fibrillin 1                                                        |
| CAG07155      | NP_060557 hypothetical protein FLJ10407                                      |
| CAG09219      | NP_000417 laminin alpha 2 subunit precursor; laminin M; merosin heavy chain  |
| CAG08008      | NP_057191 zinc finger RNA binding protein; M-phase phosphoprotein homolog    |
| CAG08514      | NP_066289 ubiquitin C                                                        |
| CAG06627      | NP_004299 Rho GTPase activating protein 1; CDC42 GTPase-activating protein   |
| CAG09658      | NP_000104 torsin A                                                           |
| CAF97571      | NP_620309 B-cell lymphoma 6 protein; B-cell CLL/lymphoma-6                   |
| CAG07575      | NP_073585 tensin-like SH2 domain containing 1; tensin-like SH2               |
| CAG05261      | NP_001873 corticotropin releasing hormone binding protein; corticotropin     |
| CAG10556      | NP_064627 kinesin-like 7; kinesin-like protein 2                             |

**S3:** List of asymmetric divergent genes of *Takifugu rubripes* with significantly lower distance to the human ortholog than other fish species.

| JGI Acc#        | annotation according to human (UniGene)                                       |
|-----------------|-------------------------------------------------------------------------------|
| FRUP00000128255 | NP_861448 SMILE protein                                                       |
| FRUP00000128906 | NP_060528 cartilage acidic protein 1; chondrocyte expressed protein 68 kDa    |
| FRUP00000129629 | NP_001381 dystrobrevin alpha isoform 1; dystrophin-related protein 3          |
| FRUP00000129698 | NP_055686 ubiquitin specific protease 52; PABP-dependent poly(A) nuclease 2   |
| FRUP00000129950 | NP_004474 glycine cleavage system protein H (aminomethyl carrier)             |
| FRUP00000130435 | XP_043863 PREDICTED: similar to RIKEN cDNA 9930036E21 gene                    |
| FRUP00000130779 | NP_078836 FLJ21963 protein                                                    |
| FRUP00000132018 | NP_000062 cystathionine-beta-synthase; serine sulfhydrase; beta-thionase      |
| FRUP00000132064 | XP_376350 PREDICTED: Rap guanine nucleotide exchange factor (GEF) 2           |
| FRUP00000132065 | NP_006310 CDP-diacylglycerol--inositol 3-phosphatidyltransferase isoform 1    |
| FRUP00000132409 | NP_004246 cytochrome c oxidase subunit Va precursor; cytochrome c oxidase     |
| FRUP00000133083 | NP_001939 dUTP pyrophosphatase                                                |
| FRUP00000133087 | NP_060662 leprecan-like 1; myxoid liposarcoma associated protein 4            |
| FRUP00000133159 | NP_818932 erythrocyte membrane protein band 4.1-like 1 isoform b; neuron-type |
| FRUP00000133686 | NP_001974 excision repair cross-complementing 1 isoform 2                     |
| FRUP00000133839 | NP_006810 stress-induced-phosphoprotein 1 (Hsp70/Hsp90-organizing protein)    |
| FRUP00000134119 | NP_060867 choline dehydrogenase                                               |
| FRUP00000134740 | NP_057376 tumor necrosis factor type 1 receptor associated protein            |
| FRUP00000135019 | NP_006693 neuropathy target esterase                                          |
| FRUP00000136741 | NP_008957 dual specificity phosphatase 14; MKP-1 like protein tyrosine        |
| FRUP00000139307 | NP_077002 hypothetical protein MGC955                                         |
| FRUP00000140706 | NP_009009 LIM domain binding 3; Z-band alternatively spliced PDZ-motif        |
| FRUP00000140918 | NP_803133 phosphatidic acid phosphatase type 2B; phosphatidic acid            |
| FRUP00000140923 | NP_004570 mitogen-activated protein kinase kinase kinase 2; Rab8              |
| FRUP00000142943 | NP_001101 a disintegrin and metalloprotease domain 10                         |
| FRUP00000143454 | NP_055045 signal recognition particle 68kDa                                   |
| FRUP00000143706 | NP_004499 isopentenyl-diphosphate delta isomerase; IPP isomerase              |
| FRUP00000143840 | NP_110382 thioredoxin domain containing; thioredoxin-related transmembrane    |
| FRUP00000144209 | NP_001327 cathepsin Z preproprotein; cathepsin X precursor; preprocathepsin   |
| FRUP00000144902 | NP_062829 calcium binding protein 5                                           |
| FRUP00000145043 | XP_375456 PREDICTED: hypothetical protein DKFZp761G2113                       |
| FRUP00000145071 | NP_005947 methylenetetrahydrofolate dehydrogenase 1                           |
| FRUP00000146010 | NP_006773 zinc finger protein-like 1; zinc-finger protein in MEN1 region      |
| FRUP00000146416 | NP_778231 juxtaposed with another zinc finger gene 1; TAK1-interacting        |
| FRUP00000148287 | XP_291222 PREDICTED: DKFZP586J0619 protein                                    |
| FRUP00000148346 | NP_037451 transitional epithelia response protein                             |
| FRUP00000149078 | NP_054782 drebrin-like; src homology 3 domain-containing protein HIP-55       |
| FRUP00000150535 | NP_002221 junction plakoglobin; gamma-catenin; catenin                        |
| FRUP00000151439 | NP_055876 jumonji domain containing 2C; gene amplified in squamous cell       |
| FRUP00000151654 | NP_001907 cytochrome c-1                                                      |
| FRUP00000152526 | NP_001689 AU RNA-binding protein/enoyl-Coenzyme A hydratase precursor         |
| FRUP00000154905 | NP_443183 terminal deoxynucleotidyltransferase interacting factor 1           |
| FRUP00000156102 | NP_006322 C2f protein                                                         |
| FRUP00000156478 | NP_116027 GATA binding protein 2; GATA-binding protein 2                      |
| FRUP00000157004 | NP_004136 myosin IXB                                                          |
| FRUP00000157499 | NP_733466 regulator of G-protein signalling 20; regulator of Gz-selective     |
| FRUP00000157532 | NP_004618 tryptophan rich basic protein; congenital heart disease 5 protein   |
| FRUP00000159300 | NP_065433 adenylate cyclase 2; ATP pyrophosphate-lyase                        |
| FRUP00000159951 | NP_061326 13kDa differentiation-associated protein                            |
| FRUP00000160003 | NP_009109 serine/threonine kinase receptor associated protein                 |
| FRUP00000161350 | XP_496546 PREDICTED: kelch repeat and BTB (POZ) domain containing 9           |
| FRUP00000161596 | NP_987095 DEAD box polypeptide 42 protein; RNA helicase-like protein; SF3b125 |
| FRUP00000161887 | NP_004126 isocitrate dehydrogenase 3 (NAD+) gamma isoform a precursor         |
| FRUP00000162556 | NP_060739 membrane-type 1 matrix metalloproteinase cytoplasmic tail binding   |
| FRUP00000162595 | NP_112179 FIP1-like 1; rearranged in hyper eosinophilia                       |
| FRUP00000162608 | NP_067014 neurogenic differentiation 4                                        |
| FRUP00000162759 | NP_000405 hydroxysteroid (17-beta) dehydrogenase 4                            |
| FRUP00000165169 | NP_775904 hypothetical protein FLJ90805                                       |

**S4:** List of asymmetric divergent genes of *Takifugu rubripes* with significantly higher distance to the human ortholog than other fish species.

| JGI Acc#        | annotation according to human (UniGene)                                        |
|-----------------|--------------------------------------------------------------------------------|
| FRUP00000144178 | NP_000051 biotinidase precursor                                                |
| FRUP00000134369 | NP_000084 alpha 1 type V collagen preproprotein                                |
| FRUP00000128173 | NP_000087 ceruloplasmin (ferroxidase)                                          |
| FRUP00000165521 | NP_000215 keratin 18; cytokeratin 18                                           |
| FRUP00000127640 | NP_000387 cathepsin K preproprotein; cathepsin X; cathepsin O1; cathepsin O2   |
| FRUP00000129867 | NP_000703 biliverdin reductase A                                               |
| FRUP00000148572 | NP_000860 5-hydroxytryptamine (serotonin) receptor 3A isoform b precursor      |
| FRUP00000158231 | NP_001232 cyclin T2 isoform a; cyclin T2a; cyclin T2b; SDS-stable              |
| FRUP00000158159 | NP_001238 ectonucleoside triphosphate diphosphohydrolase 6; CD39-like 2        |
| FRUP00000139774 | NP_001334 disabled homolog 2; mitogen-responsive phosphoprotein                |
| FRUP00000162226 | NP_001601 lysosomal acid phosphatase 2 precursor                               |
| FRUP00000143645 | NP_001695 brain-specific angiogenesis inhibitor 3                              |
| FRUP00000139096 | NP_002151 tenascin C (hexabrachion); Hexabrachion (tenascin)                   |
| FRUP00000153929 | NP_002328 low density lipoprotein receptor-related protein associated protein  |
| FRUP00000131103 | NP_002395 microfibrillar-associated protein 4; microfibril-associated          |
| FRUP00000161646 | NP_002791 proteasome beta 9 subunit isoform 1 proprotein; proteasome-related   |
| FRUP00000151511 | NP_003400 zinc finger protein 161 homolog                                      |
| FRUP00000151465 | NP_003661 differentiated embryo chondrocyte expressed gene 1                   |
| FRUP00000135860 | NP_004070 cathepsin S preproprotein                                            |
| FRUP00000144318 | NP_004384 dystroglycan 1 precursor; alpha-dystroglycan; Dystrophin-associated  |
| FRUP00000132337 | NP_004534 nebulin                                                              |
| FRUP00000155152 | NP_005202 colony stimulating factor 1 receptor precursor; CD115 antigen; FMS   |
| FRUP00000138618 | NP_005214 deoxyribonuclease I                                                  |
| FRUP00000159393 | NP_005224 ephrin receptor EphA3 isoform a precursor; eph-like tyrosine kinase  |
| FRUP00000150543 | NP_005236 FAT gene product                                                     |
| FRUP00000159806 | NP_005633 TATA box-binding protein-associated factor 2F; TAF7 RNA polymerase   |
| FRUP00000154451 | NP_005873 macrophage erythroblast attacher; erythroblast macrophage protein    |
| FRUP00000143167 | NP_006258 RAN binding protein 2; nucleoporin 358; nuclear pore complex protein |
| FRUP00000143799 | NP_006658 progesterone receptor membrane component 1; progesterone binding     |
| FRUP00000157168 | NP_006735 RBP4 gene product                                                    |
| FRUP00000132356 | NP_006801 for protein disulfide isomerase-related                              |
| FRUP00000158136 | NP_006843 tousled-like kinase 2; serine/threonine kinase; tousled-like kinase  |
| FRUP00000156726 | NP_009111 trehalase (brush-border membrane glycoprotein)                       |
| FRUP00000144075 | NP_009135 DEAD (Asp-Glu-Ala-Asp) box polypeptide 20; DEAD-box protein DP103    |
| FRUP00000164640 | NP_037452 host cell factor C2; host cell factor 2                              |
| FRUP00000143675 | NP_054861 nudix-type motif 5; nucleoside diphosphate linked moiety X-type      |
| FRUP00000161258 | NP_055227 calcyclin binding protein                                            |
| FRUP00000138226 | NP_055291 PDZ and LIM domain 3; alpha-actinin-2-associated LIM protein         |
| FRUP00000165229 | NP_055472 KIAA0406 gene product                                                |
| FRUP00000140193 | NP_055530 Rho GTPase-activating protein; RhoGAP involved in the                |
| FRUP00000156607 | NP_055736 latrophilin 1; lectomedin-2                                          |
| FRUP00000128998 | NP_056014 ankyrin repeat domain 28                                             |
| FRUP00000130545 | NP_057001 glutathione transferase kappa 1; glutathione S-transferase subunit   |
| FRUP00000160056 | NP_057019 CGI-01 protein isoform 1                                             |
| FRUP00000133120 | NP_057216 myelin gene expression factor 2                                      |
| FRUP00000148750 | NP_057226 steroid dehydrogenase homolog; 3-ketoacyl-CoA reductase              |
| FRUP00000146140 | NP_057307 protein kinase C and casein kinase substrate in neurons 3            |
| FRUP00000150117 | NP_057569 chromosome 6 open reading frame 55; My012 protein                    |
| FRUP00000159307 | NP_060480 estrogen-related receptor beta like 1; HIP1 protein interactor       |
| FRUP00000152190 | NP_060833 chromosome 10 open reading frame 59                                  |
| FRUP00000164001 | NP_060857 spermatid perinuclear RNA-binding protein                            |
| FRUP00000141350 | NP_060863 hypothetical protein FLJ11336                                        |
| FRUP00000156924 | NP_060898 hepatocellular carcinoma-associated antigen 66                       |
| FRUP00000159600 | NP_061917 hypothetical protein FLJ10996                                        |
| FRUP00000129889 | NP_061921 HCV NS3-transactivated protein 1                                     |
| FRUP00000143684 | NP_064507 potassium channel modulatory factor 1                                |
| FRUP00000129554 | NP_064555 nicalin; nicastrin-like protein                                      |
| FRUP00000158899 | NP_066928 phospholipid scramblase 1                                            |
| FRUP00000138347 | NP_067045 TcD37 homolog; prune                                                 |
| FRUP00000147503 | NP_071330 differentially expressed in FDCP 6 homolog; IRF4-binding protein     |
| FRUP00000146283 | NP_071350 chromosome 14 open reading frame 133                                 |
| FRUP00000146080 | NP_110378 transcription factor 8 (represses interleukin 2 expression)          |
| FRUP00000161888 | NP_112174 tripartite motif-containing 8; ring finger protein 27                |
| FRUP00000149115 | NP_112573 HMG-box transcription factor TCF-3                                   |
| FRUP00000135046 | NP_542400 hypothetical protein MGC9564                                         |
| FRUP00000143016 | NP_660202 similar to CG3714 gene product                                       |
| FRUP00000139310 | NP_660348 mitochondrial solute carrier protein                                 |
| FRUP00000147385 | NP_689584 hypothetical protein MGC26818                                        |
| FRUP00000143171 | NP_689742 G protein-coupled receptor 155                                       |
| FRUP00000150330 | NP_776250 zinc transporter ZnT-8                                               |
| FRUP00000147595 | NP_892017 interferon regulatory factor 2 binding protein 2                     |
| FRUP00000140238 | XP_085151 PREDICTED: YLP motif containing 1                                    |
| FRUP00000150434 | XP_114303 PREDICTED: FERM domain containing 4B                                 |
| FRUP00000147544 | XP_370618 PREDICTED: hypothetical protein FLJ20294                             |
| FRUP00000131153 | XP_372038 PREDICTED: hypothetical protein FLJ32731                             |
| FRUP00000154528 | XP_374996 PREDICTED: AMPK-related protein kinase 5                             |
| FRUP00000143731 | XP_376525 PREDICTED: zinc finger and BTB domain containing 24                  |
| FRUP00000127095 | XP_376652 PREDICTED: distal-less homeo box 6                                   |

**S5:** List of asymmetric divergent genes of *Tetraodon nigroviridis* and *Takifugu rubripes* with significantly lower distance to the human ortholog than other fish species.

| JGI Acc#        | GeneBank Acc# | annotation according to human (UniGene)                                       |
|-----------------|---------------|-------------------------------------------------------------------------------|
| FRUP00000136080 | CAG12906      | NP_000118 exostosin 1                                                         |
| FRUP00000147506 | CAG04790      | NP_004168 syntaxin 3A                                                         |
| FRUP00000132184 | CAG12160      | NP_005567 lysyl oxidase-like 1                                                |
| FRUP00000136563 | CAF89330      | NP_005721 nuclear LIM interactor-interacting factor 2                         |
| FRUP00000163237 | CAF90351      | NP_006708 spindlin                                                            |
| FRUP00000127131 | CAF99488      | NP_009049 triple functional domain (PTPRF interacting)                        |
| FRUP00000139282 | CAG00079      | NP_058625 chloride intracellular channel 5                                    |
| FRUP00000150654 | CAF90397      | NP_060113 mbt domain containing 1                                             |
| FRUP00000137831 | CAF91044      | NP_062825 fibroblast growth factor 20                                         |
| FRUP00000156028 | CAG07128      | NP_065699 twisted gastrulation                                                |
| FRUP00000130264 | CAG08921      | NP_065842 serine/threonine protein kinase TAO1 homolog; STE20-like kinase     |
| FRUP00000151490 | CAF96898      | NP_065924 leucine rich repeat neuronal 1                                      |
| FRUP00000141647 | CAF97238      | NP_068579 SEC8 protein; exocyst complex component 4; secretory protein SEC8   |
| FRUP00000136434 | CAF97420      | NP_079272 mitochondrial elongation factor G1; elongation factor G1            |
| FRUP00000130105 | CAF95949      | NP_079351 hypothetical protein FLJ23445                                       |
| FRUP00000162856 | CAG11714      | NP_110426 golgi membrane protein SB140; smooth muscle cell associated protein |
| FRUP00000145525 | CAG00266      | NP_115501 hypothetical protein DKFZp564D0478                                  |
| FRUP00000139600 | CAF96302      | NP_848634 TAFA2                                                               |
| FRUP00000129212 | CAF96493      | NP_940839 serine/threonine protein kinase 6; aurora-A; IPL1-related kinase    |

**S6:** List of asymmetric divergent genes of *Tetraodon nigroviridis* and *Takifugu rubripes* with significantly higher distance to the human ortholog than other fish species.

| JGI Acc#        | GeneBank Acc# | annotation according to human (UniGene)                                        |
|-----------------|---------------|--------------------------------------------------------------------------------|
| FRUP00000133413 | CAG11348      | NP_001989 fibulin 2 precursor; Fibulin-2                                       |
| FRUP00000146417 | CAF99414      | NP_006015 Tax1 (human T-cell leukemia virus type I) binding protein 1          |
| FRUP00000163281 | CAF92734      | NP_006604 GRB2-related adaptor protein; growth factor receptor-bound protein   |
| FRUP00000146457 | CAF90574      | NP_054727 JM1 protein                                                          |
| FRUP00000131671 | CAG06859      | NP_055816 SMART/HDAC1 associated repressor protein; Msx2 interacting nuclear   |
| FRUP00000159381 | CAG00591      | NP_062552 hypothetical protein FLJ20257                                        |
| FRUP00000153117 | CAG10911      | NP_064714 pappalysin 2 isoform 1; pregnancy-associated plasma preproprotein-A2 |
| FRUP00000138347 | CAF90087      | NP_067045 TcD37 homolog; prune                                                 |
| FRUP00000158273 | CAG01232      | NP_071918 zinc finger protein 106 homolog; zinc finger protein 106 homolog     |
| FRUP00000132611 | CAG10551      | NP_071940 chromosome 14 open reading frame 135; F protein-binding protein 2    |
| FRUP00000138063 | CAG05824      | NP_078824 hypothetical protein FLJ23047                                        |
| FRUP00000131405 | CAG06666      | NP_078857 chromosome 6 open reading frame 60                                   |
| FRUP00000144899 | CAF88516      | NP_116219 cirhin; testis expressed gene 292                                    |
| FRUP00000161684 | CAG10926      | NP_777596 proprotein convertase subtilisin/kexin type 9 preproprotein; neural  |

**S7:** List of asymmetric divergent genes of *Danio rerio* with significantly lower distance to the human ortholog than other fish species.

| Ensembl Acc#       | annotation according to human (UniGene)                                        |
|--------------------|--------------------------------------------------------------------------------|
| ENSDARP00000000426 | NP_061845 ganglioside-induced differentiation-associated protein 1             |
| ENSDARP00000001039 | NP_116062 hypothetical protein MGC10882                                        |
| ENSDARP00000002077 | NP_775740 hypothetical protein LOC92912                                        |
| ENSDARP00000002088 | NP_036347 meningioma expressed antigen 5 (hyaluronidase)                       |
| ENSDARP00000002978 | NP_002070 aspartate aminotransferase 1                                         |
| ENSDARP00000003385 | NP_056014 ankyrin repeat domain 28                                             |
| ENSDARP00000003460 | NP_113671 itchy homolog E3 ubiquitin protein ligase; atrophin-1 interacting    |
| ENSDARP00000005886 | NP_877952 arsenate resistance protein ARS2 isoform b                           |
| ENSDARP00000006171 | NP_004459 four and a half LIM domains 3                                        |
| ENSDARP00000006783 | NP_619579 cofilin 2                                                            |
| ENSDARP00000007120 | NP_060793 phosphatidylinositol 4-kinase type-II beta                           |
| ENSDARP00000007480 | NP_064627 kinesin-like 7; kinesin-like protein 2                               |
| ENSDARP00000007485 | NP_003913 guanine nucleotide exchange factor p532                              |
| ENSDARP00000008117 | NP_056515 HIRA interacting protein 5; iron-sulfur cluster scaffold protein     |
| ENSDARP00000008926 | NP_061120 MAP/microtubule affinity-regulating kinase 1                         |
| ENSDARP00000009000 | NP_002754 prospero-related homeobox 1                                          |
| ENSDARP00000009304 | NP_004795 WD40 protein Ciao1                                                   |
| ENSDARP00000009789 | NP_057671 chromobox homolog 3; heterochromatin protein HP1 gamma; HP1 gamma    |
| ENSDARP00000010282 | NP_004090 stomatin isoform a; erythrocyte membrane protein band 7.2            |
| ENSDARP00000010419 | NP_005871 DnaJ subfamily A member 2; cell cycle progression 3 protein; HIRA    |
| ENSDARP00000012263 | NP_054762 DKFZP564O123 protein                                                 |
| ENSDARP00000014083 | NP_079011 F-box protein 31; putative breast cancer tumor-suppressor; MGC15419  |
| ENSDARP00000014426 | NP_005332 GLI-Kruppel family member HKR3                                       |
| ENSDARP00000014918 | NP_004512 kinesin family member 5B; kinesin 1 (110-120kD)                      |
| ENSDARP00000015026 | NP_008878 signal recognition particle 72kDa                                    |
| ENSDARP00000015333 | NP_940965 Similar to RIKEN cDNA 1810038N08 gene                                |
| ENSDARP00000016016 | NP_055153 phosphatidylserine decarboxylase                                     |
| ENSDARP00000016111 | NP_001652 ADP-ribosylation factor 4-like; ADP-ribosylation factor-like 6       |
| ENSDARP00000016540 | NP_065120 RAB25                                                                |
| ENSDARP00000017570 | NP_055467 importin 13; Ran binding protein 13; karyopherin 13                  |
| ENSDARP00000017756 | NP_620482 myosin IIIB                                                          |
| ENSDARP00000017919 | NP_075391 FLJ21919 protein                                                     |
| ENSDARP00000018086 | NP_057192 androgen-induced 1; androgen induced protein; CGI-103 protein        |
| ENSDARP00000020960 | NP_057121 CGI-94 protein                                                       |
| ENSDARP00000021263 | NP_005069 transducin-like enhancer protein 3; transducin-like enhancer of      |
| ENSDARP00000022353 | NP_055055 LIM domains containing 1                                             |
| ENSDARP00000022377 | NP_079532 HLA-B associated transcript 8 BAT8 isoform b; G9A histone            |
| ENSDARP00000023471 | NP_055976 ADP-ribosylation factor-like 6 interacting protein                   |
| ENSDARP00000023764 | NP_006383 nucleolar protein 5A; nucleolar protein 5A (56kD with KKE/D repeat)  |
| ENSDARP00000023807 | NP_055268 putative breast adenocarcinoma marker                                |
| ENSDARP00000023828 | NP_115834 PHD-like zinc finger protein                                         |
| ENSDARP00000024082 | NP_004035 5-aminoimidazole-4-carboxamide ribonucleotide formyltransferase/IMP  |
| ENSDARP00000024124 | NP_001607 activin A type II receptor precursor                                 |
| ENSDARP00000024204 | NP_919415 vesicle-associated membrane protein-associated protein A isoform 2   |
| ENSDARP00000024552 | NP_002121 3-hydroxy-3-methylglutaryl-Coenzyme A synthase 1 (soluble            |
| ENSDARP00000025226 | NP_002789 proteasome beta 6 subunit; proteasome subunit Y; proteasome subunit  |
| ENSDARP00000025370 | NP_005708 actin related protein 2/3 complex subunit 5; Arp2/3 protein complex  |
| ENSDARP00000025487 | NP_056249 DKFZP434B168 protein                                                 |
| ENSDARP00000025803 | NP_002994 SEC14 (S. cerevisiae)-like 1                                         |
| ENSDARP00000026312 | NP_001454 frizzled-related protein; Fritz; Frzb-1; fre; frizzled (Drosophila)  |
| ENSDARP00000026380 | NP_056157 KIAA0073 protein                                                     |
| ENSDARP00000026984 | NP_110517 beta catenin-like 1; chromosome 20 open reading frame 33             |
| ENSDARP00000027703 | NP_065806 tumor differentially expressed 2                                     |
| ENSDARP00000033448 | NP_005771 lipoma HMGIC fusion partner                                          |
| ENSDARP00000034972 | NP_003861 IQ motif containing GTPase activating protein 1; rasGAP-like with IQ |
| ENSDARP00000035170 | NP_113619 component of golgi transport complex 3; tethering factor SEC34       |
| ENSDARP00000035342 | XP_035825 PREDICTED: KIAA0143 protein                                          |
| ENSDARP00000035845 | NP_056415 chromosome 20 open reading frame 22                                  |
| ENSDARP00000035932 | NP_859074 hypothetical protein LOC286097                                       |
| ENSDARP00000037454 | NP_849163 ring finger protein 166; hypothetical zinc finger protein MGC2647    |
| ENSDARP00000038219 | NP_002932 roundabout 1 isoform a; roundabout 1; axon guidance receptor         |
| ENSDARP00000038278 | NP_001776 cytidine deaminase                                                   |
| ENSDARP00000038616 | NP_000150 glutaryl-Coenzyme A dehydrogenase isoform a precursor                |
| ENSDARP00000038907 | NP_005907 minichromosome maintenance protein 7 isoform 1; DNA replication      |
| ENSDARP00000039044 | NP_056170 joined to JAZF1                                                      |
| ENSDARP00000039499 | NP_115500 haloacid dehalogenase-like hydrolase domain containing 2             |
| ENSDARP00000041136 | NP_002071 aspartate aminotransferase 2 precursor                               |
| ENSDARP00000041858 | NP_065752 KIAA1160 protein                                                     |
| ENSDARP00000043210 | NP_055776 rap2 interacting protein x                                           |
| ENSDARP00000043512 | XP_371074 PREDICTED: putative ankyrin-repeat containing protein                |
| ENSDARP00000044308 | NP_510965 fuse-binding protein-interacting repressor isoform a; siah binding   |
| ENSDARP00000045797 | NP_631895 adenosine monophosphate deaminase 2 (isoform L)                      |
| ENSDARP00000046992 | NP_055733 carbohydrate (chondroitin) synthase 1; chondroitin synthase          |
| ENSDARP00000047218 | NP_001625 S-adenosylmethionine decarboxylase 1 precursor                       |
| ENSDARP00000047608 | NP_006244 AMP-activated protein kinase beta 1 non-catalytic subunit            |
| ENSDARP00000047722 | NP_742067 similar to F10G7.10.p                                                |
| ENSDARP00000048716 | NP_036396 chromosome 22 open reading frame 5                                   |
| ENSDARP00000048880 | NP_000812 gamma-glutamyl carboxylase                                           |
| ENSDARP00000049098 | NP_004228 thyroid hormone receptor interactor 13; thyroid receptor             |
| ENSDARP00000049611 | NP_009128 frizzled 10; frizzled 10 precursor; frizzled (Drosophila) homolog    |

**S8:** List of asymmetric divergent genes of *Danio rerio* with significantly higher distance to the human ortholog than other fish species.

| Ensembl Acc#        | annotation according to human (UniGene)                                        |
|---------------------|--------------------------------------------------------------------------------|
| ENSDARP00000044235  | NP_612403 hypothetical protein BC008217                                        |
| ENSDARP00000005405  | NP_061940 hypothetical protein FLJ10613                                        |
| ENSDARP00000022032  | NP_689656 retinol dehydrogenase 12 (all-trans and 9-cis)                       |
| ENSDARP00000017530  | NP_112225 ring finger protein 146; 2610509H23Rik; dactylidin                   |
| ENSDARP00000049133  | NP_076983 hypothetical protein MGC3162                                         |
| ENSDARP00000043042  | NP_065803 G protein-coupled receptor 158                                       |
| ENSDARP00000012594  | NP_056183 pannexin 1; MRS1 protein; innexin                                    |
| ENSDARP00000042393  | NP_057165 palladin; CGI-151 protein                                            |
| ENSDARP00000028345  | NP_037511 dipeptidyl peptidase 7 preproprotein; quiescent cell proline         |
| ENSDARP00000046430  | NP_000405 hydroxysteroid (17-beta) dehydrogenase 4                             |
| ENSDARP00000036344  | NP_056495 chromosome 2 open reading frame 24                                   |
| ENSDARP00000050435  | NP_110382 thioredoxin domain containing; thioredoxin-related transmembrane     |
| ENSDARP00000034339  | NP_005345 jun D proto-oncogene; transcription factor jun-D; JunD-FL isoform    |
| ENSDARP00000013013  | NP_631918 KCCR13L                                                              |
| ENSDARP00000006977  | NP_060134 ankyrin repeat domain 10                                             |
| ENSDARP00000012660  | NP_079131 ARP5 actin-related protein 5 homolog; ARP5 (actin-related protein)   |
| ENSDARP00000025744  | XP_097886 PREDICTED: hypothetical protein XP_097886                            |
| ENSDARP00000030663  | NP_056311 DKFZP434I116 protein isoform 1                                       |
| ENSDARP00000049468  | NP_004963 Janus kinase 2; tyrosine-protein kinase JAK2                         |
| ENSDARP00000046025  | NP_000497 coagulation factor II precursor; prothrombin                         |
| ENSDARP00000014549  | NP_000539 tuberous sclerosis 2 isoform 1; tuberin isoform 1; tuberin isoform 2 |
| ENSDARP00000038928  | NP_006253 peripherin; neurofilament 4 (57kD)                                   |
| ENSDARP00000006884  | NP_004514 kinesin family member 11; thyroid receptor interacting protein 5     |
| ENSDARP00000035334  | NP_001631 N-acylaminoacyl-peptide hydrolase; acylaminoacyl-peptidase           |
| ENSDARP00000009932  | NP_002609 peroxisome biogenesis factor 13                                      |
| ENSDARP00000040085  | NP_009160 protein kinase C and casein kinase substrate in neurons 2; pacsin 2  |
| ENSDARP00000004933  | NP_079105 hypothetical protein FLJ22662                                        |
| ENSDARP00000041984  | NP_056517 chromosome 2 open reading frame 25                                   |
| ENSDARP00000048867  | NP_055769 rabphilin 3A homolog                                                 |
| ENSDARP00000018313  | NP_004321 BCL2/adenovirus E1B 19kD interacting protein 2; BCL2/adenovirus E1B  |
| ENSDARP00000006061  | NP_079228 chromosome 14 open reading frame 160                                 |
| ENSDARP00000023896  | NP_733821 lamin A/C isoform 1 precursor; 70 kDa lamin; progeria 1              |
| ENSDARP00000018746  | NP_060343 ankyrin repeat and SOCS box-containing 6 isoform 1                   |
| ENSDARP00000023886  | NP_056416 hect domain and RLD 4                                                |
| ENSDARP00000025759  | NP_005782 M-phase phosphoprotein 10                                            |
| ENSDARP00000004443  | NP_003309 TTK protein kinase                                                   |
| ENSDARP00000045818  | XP_291947 PREDICTED: similar to hephaestin                                     |
| ENSDARP00000026009  | NP_071435 PP1201 protein                                                       |
| ENSDARP00000004123  | NP_001074 phosphodiesterase 5A isoform 1; cGMP-binding cGMP-specific           |
| ENSDARP00000049572  | NP_005248 GATA binding protein 6; GATA-binding protein 6                       |
| ENSDARP00000034390  | NP_079425 hypothetical protein FLJ20920                                        |
| ENSDARP00000016765  | NP_005300 glutamic-pyruvate transaminase (alanine aminotransferase)            |
| ENSDARP00000007458  | NP_874365 scribble isoform a                                                   |
| ENSDARP00000041441  | NP_001135 autocrine motility factor receptor isoform a                         |
| ENSDARP00000003579  | NP_006304 ubiquitin specific protease 15; deubiquitinating enzyme              |
| ENSDARP00000046868  | NP_858045 nuclear receptor coactivator 3 isoform a; amplified in breast        |
| ENSDARP00000038702  | NP_115920 kin of IRRE like 3                                                   |
| ENSDARP00000046172  | NP_079100 nuclear protein UKp68 isoform 1                                      |
| ENSDARP00000009626  | NP_006803 amplified in osteosarcoma                                            |
| ENSDARP000000050527 | NP_000541 tyrosinase-related protein 1                                         |
| ENSDARP00000046451  | NP_079107 PRIP-interacting protein PIPMT; PRIP-interacting protein             |
| ENSDARP00000034236  | NP_055876 jumonji domain containing 2C; gene amplified in squamous cell        |
| ENSDARP00000025891  | NP_002499 nidogen (enactin); Nidogen; nidogen (enactin)                        |
| ENSDARP00000004251  | NP_653185 hypothetical protein FLJ30525                                        |
| ENSDARP00000003415  | NP_068775 glutamate receptor 6 isoform 1 precursor; excitatory amino acid      |
| ENSDARP00000019313  | NP_001837 alpha 2 type IV collagen preproprotein; canstatin                    |
| ENSDARP00000023514  | NP_060573 leucine rich repeat containing 5; leucine-rich repeat-containing 5   |
| ENSDARP00000018351  | NP_861454 collomin                                                             |
| ENSDARP00000021392  | NP_079123 transmembrane channel-like 7                                         |
| ENSDARP00000011386  | NP_055203 hypothetical protein MGC29875                                        |
| ENSDARP00000046347  | NP_005551 laminin alpha 5; laminin alpha-5 chain                               |
| ENSDARP00000003022  | NP_061335 kelch-like 9                                                         |
| ENSDARP00000048028  | NP_071407 cadherin related 23 isoform 1 precursor; cadherin-23; otocadherin    |
| ENSDARP00000049495  | NP_077006 melanophilin                                                         |

**S9:** List of asymmetric divergent genes of *Oryzias latipes* with significantly lower distance to the human ortholog than other fish species.

| GeneBank Acc# | annotation according to human (UniGene)                                         |
|---------------|---------------------------------------------------------------------------------|
| AU167144      | NP_003394 YY1 transcription factor                                              |
| AU167274      | NP_000156 connexin 43; oculodentodigital dysplasia (syndactyly type III)        |
| AU167343      | NP_056097 CLIP-associating protein 1; multiple asters 1                         |
| AU167618      | NP_004156 Ras-related associated with diabetes; RAS (RAD and GEM) like GTP      |
| AU167785      | NP_055741 slit and trk like 3 protein; slit and trk like gene 3                 |
| AU167800      | NP_065759 solute carrier family 12 member 5; erythroid K-Cl cotransporter 2     |
| AU167923      | NP_036433 atrophin-1 interacting protein 1; likely ortholog of mouse activin    |
| AU168600      | NP_001356 postsynaptic density protein 95; discs large homolog 4                |
| AU169110      | NP_653229 chromosome 20 open reading frame 140                                  |
| AU169163      | NP_079455 plexin A2; plexin 2; plexin-A2                                        |
| AU169168      | NP_000654 4-aminobutyrate aminotransferase precursor; GABA transferase          |
| AU169236      | NP_055964 ral guanine nucleotide dissociation stimulator-like 1; RaGDS-like     |
| AU169784      | NP_006651 ClpX caseinolytic protease X homolog                                  |
| AU170423      | NP_004938 dedicator of cytokinesis 3; dedicator of cyto-kinesis 3               |
| AU170444      | NP_060111 kinesin family member 21A; NY-REN-62 antigen                          |
| AU170950      | NP_055736 latrophilin 1; lectomedin-2                                           |
| AU171067      | NP_002367 MAP/microtubule affinity-regulating kinase 3                          |
| AU171249      | NP_002232 potassium inwardly-rectifying channel J10; inward rectifier K+        |
| AU171332      | NP_008954 Rap guanine nucleotide exchange factor (GEF) 4; exchange protein      |
| AU171374      | XP_1166420 PREDICTED: phosphatase and actin regulator 1                         |
| AU171447      | NP_004647 BRCA1 associated protein-1; ubiquitin carboxy-terminal hydrolase      |
| AU171481      | NP_003673 MAP-kinase activating death domain-containing protein isoform d       |
| AU176665      | NP_006464 TAF6-like RNA polymerase II; p300/CBP-associated factor               |
| AU177030      | NP_004662 protein inhibitor of activated STAT X isoform beta                    |
| AU177167      | NP_079170 hypothetical protein FLJ14075                                         |
| AU177176      | NP_055566 metastasis suppressor 1; missing in metastasis                        |
| AU177261      | NP_006141 LIM domain only 6                                                     |
| AU177627      | NP_009055 utrophin; dystrophin-related protein                                  |
| AU177751      | NP_443102 sorting nexin associated golgi protein 1; sorting nexin 18            |
| AU180234      | NP_775105 SNF2 histone linker PHD RING helicase; 2610103K11Rik                  |
| BJ004132      | NP_004514 kinesin family member 11; thyroid receptor interacting protein 5      |
| BJ007726      | NP_689742 G protein-coupled receptor 155                                        |
| BJ009104      | NP_005515 hairy and enhancer of split 1; transcription factor HES-1             |
| BJ000038      | NP_002530 ornithine decarboxylase 1                                             |
| BJ002908      | NP_663788 Rho guanine nucleotide exchange factor 7 isoform b; SH3               |
| BJ002997      | XP_291015 PREDICTED: likely homolog of rat kinase D-interacting substance       |
| BJ003764      | NP_003609 mitogen-activated protein kinase kinase kinase 3; germinal            |
| BJ008665      | NP_008936 transducin-like enhancer protein 4; enhancer of split groucho 4       |
| BJ008783      | NP_031401 TAR DNA binding protein; TAR DNA-binding protein-43                   |
| BJ008810      | NP_000457 peroxisome biogenesis factor 1                                        |
| BJ008817      | NP_009160 protein kinase C and casein kinase substrate in neurons 2; paccin 2   |
| BJ010925      | NP_055833 KIAA1117 protein                                                      |
| BJ011691      | NP_004332 carbamoylphosphate synthetase 2/aspartate                             |
| BJ012243      | NP_073585 tensin-like SH2 domain containing 1; tensin-like SH2                  |
| BJ012254      | NP_001232 cyclin T2 isoform a; cyclin T2a; cyclin T2b; SDS-stable               |
| BJ012312      | NP_004929 death-associated protein kinase 1                                     |
| BJ004544      | NP_116045 DEAH (Asp-Glu-Ala-His) box polypeptide 37; DEAD/DEAH box helicase     |
| BJ000375      | NP_004422 ephrin receptor EphA2; epithelial cell receptor protein tyrosine      |
| BJ001056      | NP_653169 chromosome 14 open reading frame 9                                    |
| BJ004731      | NP_055662 NICE-4 protein                                                        |
| BJ005366      | NP_079410 hypothetical protein FLJ12178                                         |
| BJ009760      | NP_002304 actin-binding LIM protein 1 isoform a; actin-binding LIM protein      |
| BJ009771      | XP_048747 PREDICTED: KIAA1223 protein                                           |
| BJ011904      | NP_079047 hypothetical protein FLJ13848                                         |
| BJ012648      | NP_065799 KIAA1287 protein                                                      |
| BJ013377      | NP_115612 ubiquitin specific protease 48; ubiquitin specific protease 31        |
| BJ014248      | NP_004835 SH3-domain binding protein 5 (BTK-associated); SH3 binding protein    |
| BJ002146      | NP_003122 serum response factor (c-fos serum response element-binding           |
| BJ005545      | NP_055389 nuclear autoantigen; cell cycle S/G2 nuclear autoantigen              |
| BJ005642      | NP_055630 thyroid hormone receptor-associated protein; thyroid hormone          |
| BJ005657      | NP_079350 Fraser syndrome 1 isoform 1; extracellular matrix protein             |
| BJ005724      | NP_036412 FtsJ homolog 1 isoform a; rRNA (uridine-2'-O-)-methyltransferase      |
| BJ006410      | NP_061908 protocadherin 18 precursor; protocadherin 68-like protein             |
| BJ007259      | NP_037528 ubiquitin specific protease 25; ubiquitin specific protease USP25     |
| BJ010058      | NP_542768 intermediate filament-like protein MGC:2625 isoform 2; intermediate   |
| BJ013886      | NP_061031 ubiquitin specific protease 49                                        |
| BJ000816      | NP_005582 meiotic recombination 11 homolog A isoform 1; double-strand break     |
| BJ000842      | XP_034594 PREDICTED: KIAA1604 protein                                           |
| BJ007320      | NP_009135 DEAD (Asp-Glu-Ala-Asp) box polypeptide 20; DEAD-box protein DP103     |
| BJ007326      | NP_003172 transcription factor T; T brachyury-like; T brachyury (mouse)         |
| BJ008255      | XP_375553 PREDICTED: KIAA0963                                                   |
| BJ008256      | XP_371277 PREDICTED: similar to RIKEN cDNA C230093N12                           |
| BJ011040      | NP_005325 host cell factor C1 (VP16-accessory protein)                          |
| BJ013919      | NP_037452 host cell factor C2; host cell factor 2                               |
| BJ013939      | NP_002870 RAD52 homolog isoform alpha; recombination protein RAD52              |
| BJ011306      | NP_002664 plexin B1; plexin 5; semaphorin receptor                              |
| BJ020308      | NP_031375 PAX transcription activation domain interacting protein 1 like        |
| BJ014506      | NP_115635 hypothetical protein DKFZp434F054                                     |
| BJ021405      | NP_714941 nucleoporin 62kDa; nuclear pore glycoprotein p62                      |
| BJ017567      | XP_033173 PREDICTED: protocadherin 19                                           |
| BJ025664      | NP_054868 HSPC049 protein                                                       |
| BJ025751      | NP_787072 exocyst complex 84-kDa subunit                                        |
| AU240484      | NP_000129 fibrillin 1                                                           |
| AU242782      | NP_695003 hypothetical protein MGC32065                                         |
| AU244152      | NP_055986 exportin 6; RAN binding protein 20                                    |
| AJ457222      | NP_003277 DNA topoisomerase I type I DNA topoisomerase                          |
| AJ457493      | NP_055383 UDP-N-acetyl-alpha-D-galactosamine:polypeptide                        |
| BJ493563      | NP_699202 PDZ domain containing ring finger 1                                   |
| BJ493781      | NP_004973 potassium inwardly-rectifying channel J8; inwardly rectifying         |
| BJ495426      | NP_001388 endothelin converting enzyme 1                                        |
| BJ496901      | NP_055784 KIAA0893 protein                                                      |
| BJ497591      | NP_000471 adenosine monophosphate deaminase (isoform E)                         |
| BJ499461      | NP_000427 3-oxoacid CoA transferase 1 precursor; succinyl-CoA:3-ketoacid-CoA    |
| BJ500895      | NP_056986 progesterin-induced protein; ubiquitin-protein ligase; hyperplastic   |
| BJ501370      | NP_055966 DIP2-like protein isoform a; disco-interacting protein 2 (Drosophila) |
| BJ501585      | NP_064583 GK001 protein                                                         |
| BJ502508      | XP_097736 PREDICTED: chromosome 20 open reading frame 82                        |

**S9:** List of asymmetric divergent genes of *Oryzias latipes* with significantly lower distance to the human ortholog than other fish species.

|          |                                                                                     |
|----------|-------------------------------------------------------------------------------------|
| BJ503567 | NP_062826 methyltransferase like 3; putative methyltransferase; 2310024F18Rik       |
| BJ506101 | XP_499556 PREDICTED: hypothetical protein FLJ10747                                  |
| BJ507473 | NP_958839 growth arrest-specific 7 isoform c                                        |
| BJ487313 | NP_003301 tumor suppressing subtransferable candidate 1                             |
| BJ488812 | NP_114141 hemicentin; fibulin 6                                                     |
| BJ489466 | NP_001805 cathepsin C isoform a preproprotein; dipeptidyl-peptidase I               |
| BJ489868 | NP_003588 TGFB inducible early growth response 2                                    |
| BJ489926 | NP_005112 thyroid hormone receptor associated protein 1                             |
| BJ490421 | NP_054722 DEAH (Asp-Glu-Ala-His) box polypeptide 38; pre-mRNA splicing factor       |
| BJ490861 | NP_004289 nucleoporin 155kDa isoform 2; nuclear pore complex protein Nup155         |
| BJ490986 | XP_039796 PREDICTED: TRAF2 and NCK interacting kinase                               |
| BJ512308 | NP_945341 N-acyl-phosphatidylethanolamine-hydrolyzing phospholipase D               |
| BJ516424 | NP_001026 ryanodine receptor 2                                                      |
| BJ517069 | NP_009169 peroxisomal membrane protein 4 isoform a; 24 kDa peroxisomal              |
| BJ517858 | NP_005917 microfibrillar-associated protein 1                                       |
| BJ517869 | NP_060857 spermatid perinuclear RNA-binding protein                                 |
| BJ518797 | NP_061335 kelch-like 9                                                              |
| BJ519069 | NP_004244 phospholipase A2-activating protein                                       |
| BJ519269 | NP_004321 BCL2/adenovirus E1B 19kD interacting protein 2; BCL2/adenovirus E1B       |
| BJ519895 | NP_009060 zinc finger protein of the cerebellum 2; Zic family member 2              |
| BJ520045 | NP_065901 Ran-binding protein 10                                                    |
| BJ520537 | NP_000181 hydroxymethylbilane synthase; porphobilinogen deaminase                   |
| BJ522173 | NP_001370 DNA (cytosine-5-)-methyltransferase 1; DNA methyltransferase 1            |
| BJ524171 | NP_056201 component of oligomeric golgi complex 4; complexed with Dor1p;            |
| BJ524506 | NP_000170 mutS homolog 6; G/T mismatch-binding protein; mutS (E. coli) homolog      |
| BJ525224 | NP_060895 phosphatidylinositol 4-kinase type II                                     |
| BJ525915 | NP_722523 sorting nexin 14 isoform a                                                |
| BJ526240 | NP_002379 minichromosome maintenance protein 3; cervical cancer                     |
| BJ527420 | NP_003571 neutral sphingomyelinase (N-SMase) activation associated factor           |
| BJ527642 | NP_065943 dextex 2; dextex (Drosophila) homolog 2                                   |
| BJ527988 | NP_064505 UDP-glucose ceramide glucosyltransferase-like 1                           |
| BJ530427 | NP_065165 putative homeodomain transcription factor 2                               |
| BJ537125 | NP_056016 block of proliferation 1                                                  |
| BJ539899 | NP_008993 nuclear phosphoprotein similar to <i>S. cerevisiae</i> PWP1               |
| BJ540847 | NP_064708 hypothetical protein DKFZp434K046                                         |
| BJ542973 | NP_005137 squamous cell carcinoma antigen recognized by T cells 1; U4/U6.U5         |
| BJ543391 | NP_000981 ribosomal protein L27a; 60S ribosomal protein L27a                        |
| AB095501 | NP_055748 SEC31-like 1 isoform 1; yeast Sec31p homolog; protein-transport           |
| BJ704133 | NP_055478 jumonji domain containing 2A                                              |
| BJ704447 | NP_005737 pre-B-cell colony enhancing factor 1 isoform a                            |
| BJ704659 | NP_056323 TCDD-inducible poly(ADP-ribose) polymerase                                |
| BJ704694 | NP_060631 NAD synthetase 1; glutamine-dependent NAD synthetase                      |
| BJ705222 | NP_002949 RYK receptor-like tyrosine kinase precursor; hydroxyaryl-protein          |
| BJ705340 | NP_001109 type I adenylate cyclase activating polypeptide receptor precursor        |
| BJ706016 | NP_060635 polybromo 1                                                               |
| BJ706074 | NP_002145 heat shock 70kDa protein 4 isoform a; heat shock 70kD protein 4           |
| BJ706077 | NP_006416 step II splicing factor SLU7                                              |
| BJ706164 | NP_061936 echinoderm microtubule associated protein like 4                          |
| BJ706497 | NP_055524 ubiquitin specific protease 34                                            |
| BJ706791 | XP_027330 PREDICTED: RNA binding motif protein 25                                   |
| BJ707051 | NP_061832 DAZ associated protein 1 isoform b; deleted in azoospermia                |
| BJ707934 | NP_057569 chromosome 6 open reading frame 55; My012 protein                         |
| BJ707948 | NP_004032 arrestin beta 1 isoform A                                                 |
| BJ707979 | NP_056988 translation initiation factor IF2                                         |
| BJ708027 | NP_003165 supervillin isoform 1; membrane-associated F-actin binding protein        |
| BJ708068 | NP_073738 sperm protein SSP41; transcript increased in spermiogenesis 78            |
| BJ708573 | NP_003899 eukaryotic translation initiation factor 2 beta; eukaryotic               |
| BJ708635 | NP_002960 mitogen-activated protein kinase 12; p38gamma; stress-activated           |
| BJ709021 | NP_110417 T-cell immunomodulatory protein                                           |
| BJ709423 | NP_620148 ectonucleoside triphosphate diphosphohydrolase 8; apyrase                 |
| BJ709607 | NP_001922 dihydrolipoamide S-acetyltransferase (E2 component of pyruvate            |
| BJ709687 | XP_379983 PREDICTED: similar to KIAA0010                                            |
| BJ709692 | NP_006151 neurogenic differentiation 2                                              |
| BJ710203 | XP_376680 PREDICTED: KIAA1718 protein                                               |
| BJ711169 | NP_149989 hypothetical protein LOC92922                                             |
| BJ711261 | NP_000541 tyrosinase-related protein 1                                              |
| BJ711276 | NP_003070 SWI/SNF-related matrix-associated actin-dependent regulator               |
| BJ711340 | NP_036461 monocyte to macrophage differentiation-associated                         |
| BJ711358 | NP_009204 repressor of estrogen receptor activity; B-cell associated protein        |
| BJ712018 | NP_057191 zinc finger RNA binding protein; M-phase phosphoprotein homolog           |
| BJ712122 | NP_542131 suppressor of actin mutations 2-like isoform a; dJ1033B10.5; SAC2         |
| BJ712436 | NP_075067 vacuolar protein sorting 33A                                              |
| BJ712542 | NP_002491 neurogenic differentiation 1; Neurogenic differentiation                  |
| BJ712805 | NP_009180 Kruppel-like factor 12 isoform a; KLF12 zinc finger transcriptional       |
| BJ713400 | NP_006480 neuro-oncological ventral antigen 1 isoform 2; paraneoplastic Ri          |
| BJ713568 | NP_064507 potassium channel modulatory factor 1; differentially expressed in        |
| BJ714237 | NP_002582 cytosolic phosphoenolpyruvate carboxykinase 1; phosphoenolpyruvate        |
| BJ714382 | NP_071903 limb region 1 protein; limb region 1                                      |
| BJ715164 | NP_002878 arginyl-tRNA synthetase                                                   |
| BJ715687 | NP_057300 debranching enzyme homolog 1; debranching enzyme ( <i>S. Cerevisiae</i> ) |
| BJ717464 | NP_003240 thimet oligopeptidase 1                                                   |
| BJ719118 | NP_658985 apolipoprotein A-I binding protein; apoA-I binding protein                |
| BJ719534 | NP_001121 amino-terminal enhancer of split isoform b                                |
| BJ720039 | XP_045423 PREDICTED: KIAA0701 protein                                               |
| BJ720872 | NP_056380 zinc finger protein 294                                                   |
| BJ721289 | NP_001816 sarcomeric mitochondrial creatine kinase precursor; basic-type            |
| BJ723358 | NP_006074 RED protein; RD element; prer protein; IK factor;                         |
| BJ724303 | NP_001924 dihydrolipoamide S-succinyltransferase (E2 component)                     |
| BJ724521 | NP_115497 implantation-associated protein                                           |
| BJ726625 | NP_077022 mitogen-activated protein kinase associated protein 1; ras                |
| BJ727296 | NP_694856 ankyrin repeat domain protein 15; kidney ankyrin repeat-containing        |
| BJ727744 | NP_115607 hypothetical protein FLJ22875                                             |
| BJ728080 | NP_733751 myeloid/lymphoid or mixed-lineage leukemia 3                              |
| BJ728082 | NP_001264 chromodomain helicase DNA binding protein 4; Mi-2b                        |
| BJ728141 | NP_055262 ADP-ribosylation factor interacting protein 1 (arfaptin 1)                |
| BJ726961 | NP_057128 CGI-105 protein                                                           |
| BJ728281 | NP_055615 engulfment and cell motility 1 isoform 1; ced-12 homolog 1                |
| BJ728299 | NP_003211 transcription factor AP-2 alpha; activating enhancer-binding              |
| BJ728451 | NP_004586 spermine synthase; spermidine aminopropyltransferase                      |
| BJ728665 | NP_055596 Rb1-inducible coiled coil protein 1                                       |

**S9: List of asymmetric divergent genes of *Oryzias latipes* with significantly lower distance to the human ortholog than other fish species.**

BJ729021 NP\_001096 activin A type I receptor precursor; hydroxyalkyl-protein kinase  
BJ729302 NP\_004836 CTP-phosphocholine cytidyltransferase b  
BJ729374 NP\_000993 ribosomal protein P0; 60S acidic ribosomal protein P0  
BJ729829 NP\_056203 chromosome 6 open reading frame 109; natural killer cell-specific  
BJ729946 NP\_003015 intersectin 1 isoform ITSN-1; SH3 domain protein-1A  
BJ729976 NP\_002309 lysyl oxidase-like 2  
BJ730502 NP\_115604 male sterility domain containing 2  
BJ730543 NP\_620309 B-cell lymphoma 6 protein; B-cell CLL/lymphoma-6  
BJ730728 NP\_056416 hect domain and RLD 4  
BJ730756 NP\_005603 RE1-silencing transcription factor; repressor binding to the X2  
BJ731205 NP\_006631 MLL septin-like fusion; septin D1; MLL septin-like fusion  
BJ731438 NP\_006345 transcriptional adaptor 3-like isoform a  
BJ732302 NP\_004521 matrix metalloproteinase 2 preproprotein; gelatinase neutrophil  
BJ732615 NP\_004963 Janus kinase 2; tyrosine-protein kinase JAK2  
BJ732869 NP\_066025 CEGP1 protein  
BJ732904 XP\_060020 PREDICTED: hypothetical protein BC016683  
BJ733043 NP\_003244 T-cell lymphoma invasion and metastasis 1; human T-lymphoma invasion  
BJ733298 NP\_036585 transducin (beta)-like 2 isoform 1; Williams-Beuren syndrome  
BJ733387 NP\_000611 nitric oxide synthase 1 (neuronal)  
BJ733416 NP\_149105 MADP-1 protein; U11/U12 snRNP 31K  
BJ733490 NP\_006256 RAD21 homolog; protein involved in DNA double-strand break repair  
BJ733549 NP\_055336 SH3-domain binding protein 4  
BJ734294 NP\_009133 A-kinase anchor protein 10 precursor; dual-specificity A-kinase  
BJ734614 NP\_004555 PET112-like; PET112 (yeast homolog)-like  
BJ734780 NP\_005923 mitochondrial intermediate peptidase  
BJ734934 NP\_055535 serine/threonine kinase 2; Ste20-like kinase; SNF1 sucrose  
BJ735209 NP\_006627 methylene tetrahydrofolate dehydrogenase 2 precursor; NAD-dependent  
BJ735211 NP\_056442 LDL receptor adaptor protein  
BJ735266 NP\_001027 ryanodine receptor 3  
BJ735363 NP\_057422 Ran binding protein 11  
BJ735367 NP\_057515 mitogen-activated protein kinase 8 interacting protein 2 isoform 2  
BJ735433 NP\_002102 huntingtin  
BJ735889 NP\_079094 ubiquitin-activating enzyme E1-domain containing 1 isoform 1  
BJ736362 NP\_003403 zinc finger protein of the cerebellum 1; Zic family member 1  
BJ736836 NP\_005511 heterogeneous nuclear ribonucleoprotein H1  
BJ736871 NP\_056051 latrophilin 3; latrophilin homolog 3 (cow); lectomedin 3  
BJ736888 NP\_005095 bromodomain containing protein 2; female sterile homeotic-related  
BJ737008 NP\_064555 nicalin; nicastrin-like protein  
BJ737046 NP\_001339 death-associated protein kinase 3  
BJ737071 NP\_116232 fibrinogen C domain containing 1  
BJ737305 NP\_002871 v-raf-1 murine leukemia viral oncogene homolog 1  
BJ737548 NP\_036322 formyltetrahydrofolate dehydrogenase isoform a  
BJ737706 NP\_689559 hypothetical protein MGC34680  
BJ737712 NP\_005299 G protein-coupled receptor kinase 5  
BJ738539 NP\_005105 heparan sulfate D-glucosaminyl 3-O-sulfotransferase 1 precursor  
BJ738782 NP\_057165 palladin; CGI-151 protein  
BJ739066 NP\_061921 HCV NS3-transactivated protein 1  
BJ740453 NP\_000897 natriuretic peptide receptor A/guanylate cyclase A  
BJ741424 NP\_112506 chromosome 20 open reading frame 18 isoform 2  
BJ742023 NP\_005324 holocytochrome c synthase (cytochrome c heme-lyase)  
BJ742359 NP\_000480 transcriptional regulator ATRX isoform 1; DNA dependent ATPase  
BJ742416 NP\_054727 JM1 protein  
BJ743130 NP\_002435 moesin  
BJ746379 NP\_116233 microtubule associated serine/threonine kinase-like  
BJ748332 NP\_003128 SFRS protein kinase 1; SR protein kinase 1  
BJ748807 NP\_659501 SH3 and cysteine rich domain 3  
AV668349 NP\_114402 N-myc downstream-regulated gene 3 isoform a; N-myc  
AV668735 XP\_047325 PREDICTED: Tho2  
AV668786 XP\_374996 PREDICTED: AMPK-related protein kinase 5  
AV669002 NP\_000515 5-hydroxytryptamine (serotonin) receptor 1A  
AV669139 NP\_055683 ring finger protein 10  
AV670534 NP\_149044 hippocampus abundant transcript 1; tetracycline transporter-like  
AV670555 NP\_005706 uronyl-2-sulfotransferase; uronyl 2-sulfotransferase  
AV670991 NP\_002219 v-jun avian sarcoma virus 17 oncogene homolog; Jun activation

---

**S10:** List of asymmetric divergent genes of *Oryzias latipes* with significantly higher distance to the human ortholog than other fish species.

| GeneBank Acc# | annotation according to human (UniGene)                                          |
|---------------|----------------------------------------------------------------------------------|
| BJ518323      | NP_055055 LIM domains containing 1                                               |
| AU172100      | NP_003861 IQ motif containing GTPase activating protein 1; rasGAP-like with IQ   |
| BJ730618      | NP_009009 LIM domain binding 3; Z-band alternatively spliced PDZ-motif           |
| BJ493186      | NP_001101 a disintegrin and metalloprotease domain 10                            |
| BJ728956      | NP_000035 androgen receptor; dihydrotestosterone receptor                        |
| BJ000112      | NP_003864 neuropilin 1                                                           |
| BJ713413      | NP_000689 arachidonate 5-lipoxygenase                                            |
| AU169472      | NP_055078 YME1-like 1 isoform 3; ATP-dependent metalloprotease FtsH1 homolog     |
| AJ410705      | NP_005609 delta-like 1; delta-like 1 protein; delta ( <i>Drosophila</i> )-like 1 |
| AU168298      | NP_065170 similar to aspartate beta hydroxylase (ASPH)                           |
| BJ705617      | NP_001296 claudin 4; Clostridium perfringens enterotoxin receptor 1              |
| BJ730796      | NP_116231 hypothetical protein FLJ14803                                          |
| AU170247      | NP_055862 KIAA0090 protein                                                       |
| BJ714458      | NP_055295 zinc finger protein 544                                                |
| BJ738268      | NP_055109 translocating chain-associating membrane protein                       |
| BJ705015      | NP_006722 fukutin                                                                |
| BJ524561      | NP_036440 F-box and leucine-rich repeat protein 11; F-box protein FBL11          |
| AU168617      | XP_106386 PREDICTED: KIAA1345 protein                                            |
| BJ517379      | NP_000254 alpha-N-acetylglucosaminidase                                          |
| BJ008666      | NP_057345 delta-tubulin                                                          |
| AU169692      | XP_497656 PREDICTED: KIAA0962 protein                                            |
| BJ728505      | XP_371078 PREDICTED: similar to Galectin-3 binding protein precursor             |
| BJ498785      | NP_066192 claudin 9                                                              |
| BJ025006      | NP_776163 hypothetical protein MGC50559                                          |
| BJ502548      | NP_002072 glypican 1 precursor                                                   |
| BJ513172      | XP_292184 PREDICTED: similar to immune-responsive gene 1                         |
